# Supplementary material
Source: MDPI journal article supplement (https://www.mdpi.com/2313-576X/9/3/59)
Supplement: s1 [file s1]

**Supplementary Data Table S1. Percent Darkness During Total Waking Day and During Sleep by City, Season, and Shift by Time Change Condition**

|               |        |         | Percent Darkness<br>During Total Waking<br>Day |     |     | Percent Darkness<br>During Sleep |     |     | Percent Waketimes<br>Before Sunrise |      |      |
|---------------|--------|---------|------------------------------------------------|-----|-----|----------------------------------|-----|-----|-------------------------------------|------|------|
| City          | Season | Shift   | CTA                                            | DST | ST  | CTA                              | DST | ST  | CTA                                 | DST  | ST   |
| New York City | Autumn | Day     | 33%                                            | 28% | 34% | 86%                              | 96% | 84% | 13%                                 | 75%  | 0%   |
|               |        | Evening | 41%                                            | 37% | 42% | 62%                              | 72% | 60% | 12%                                 | 61%  | 0%   |
|               |        | Night   | 51%                                            | 49% | 51% | 51%                              | 53% | 49% | 10%                                 | 20%  | 0%   |
|               |        | School  | 33%                                            | 28% | 34% | 86%                              | 96% | 84% | 13%                                 | 75%  | 0%   |
|               | Winter | Day     | 34%                                            | 30% | 34% | 90%                              | 98% | 90% | 71%                                 | 100% | 71%  |
|               |        | Evening | 41%                                            | 36% | 41% | 67%                              | 79% | 67% | 58%                                 | 100% | 51%  |
|               |        | Night   | 53%                                            | 51% | 53% | 52%                              | 56% | 52% | 10%                                 | 100% | 10%  |
|               |        | School  | 33%                                            | 30% | 33% | 91%                              | 98% | 91% | 76%                                 | 100% | 76%  |
|               | Spring | Day     | 21%                                            | 19% | 25% | 85%                              | 89% | 77% | 23%                                 | 45%  | 0%   |
|               |        | Evening | 30%                                            | 29% | 34% | 61%                              | 65% | 53% | 16%                                 | 34%  | 0%   |
|               |        | Night   | 42%                                            | 41% | 40% | 42%                              | 45% | 47% | 0%                                  | 10%  | 0%   |
|               |        | School  | 22%                                            | 19% | 25% | 85%                              | 91% | 78% | 33%                                 | 63%  | 0%   |
|               | Summer | Day     | 9%                                             | 9%  | 15% | 67%                              | 67% | 55% | 0%                                  | 0%   | 0%   |
|               |        | Evening | 19%                                            | 19% | 25% | 43%                              | 43% | 31% | 0%                                  | 0%   | 0%   |
|               |        | Night   | 30%                                            | 30% | 28% | 26%                              | 26% | 29% | 0%                                  | 0%   | 0%   |
| Chicago       | Autumn | Day     | 33%                                            | 28% | 34% | 85%                              | 95% | 83% | 79%                                 | 100% | 73%  |
|               |        | Evening | 42%                                            | 37% | 43% | 61%                              | 71% | 59% | 67%                                 | 100% | 61%  |
|               |        | Night   | 51%                                            | 49% | 51% | 51%                              | 53% | 49% | 40%                                 | 100% | 20%  |
|               |        | School  | 33%                                            | 28% | 34% | 86%                              | 95% | 84% | 81%                                 | 100% | 75%  |
|               | Winter | Day     | 34%                                            | 30% | 34% | 90%                              | 98% | 90% | 100%                                | 100% | 100% |
|               |        | Evening | 41%                                            | 36% | 41% | 67%                              | 79% | 67% | 100%                                | 100% | 100% |
|               |        | Night   | 53%                                            | 51% | 53% | 52%                              | 56% | 52% | 100%                                | 100% | 100% |
|               |        | School  | 34%                                            | 30% | 34% | 91%                              | 98% | 91% | 100%                                | 100% | 100% |
|               | Spring | Day     | 21%                                            | 19% | 25% | 84%                              | 88% | 75% | 77%                                 | 90%  | 38%  |
|               |        | Evening | 31%                                            | 29% | 34% | 60%                              | 64% | 52% | 63%                                 | 78%  | 31%  |
|               |        | Night   | 42%                                            | 40% | 40% | 41%                              | 45% | 46% | 20%                                 | 40%  | 10%  |
|               |        | School  | 22%                                            | 19% | 25% | 84%                              | 90% | 77% | 79%                                 | 96%  | 50%  |
|               | Summer | Day     | 8%                                             | 8%  | 15% | 65%                              | 65% | 53% | 0%                                  | 0%   | 0%   |
|               |        | Evening | 19%                                            | 19% | 25% | 41%                              | 41% | 29% | 0%                                  | 0%   | 0%   |
|               |        | Night   | 29%                                            | 29% | 28% | 25%                              | 25% | 28% | 0%                                  | 0%   | 0%   |
| El Paso       | Autumn | Day     | 30%                                            | 25% | 31% | 85%                              | 95% | 83% | 12%                                 | 70%  | 0%   |
|               |        | Evening | 39%                                            | 34% | 40% | 61%                              | 71% | 59% | 12%                                 | 58%  | 0%   |
|               |        | Night   | 48%                                            | 46% | 48% | 51%                              | 53% | 49% | 10%                                 | 10%  | 0%   |
|               |        | School  | 30%                                            | 25% | 31% | 85%                              | 95% | 83% | 12%                                 | 70%  | 0%   |
|               | Winter | Day     | 30%                                            | 26% | 30% | 88%                              | 97% | 88% | 60%                                 | 97%  | 60%  |
|               |        | Evening | 38%                                            | 33% | 38% | 65%                              | 77% | 65% | 48%                                 | 97%  | 46%  |
|               |        | Night   | 49%                                            | 48% | 49% | 51%                              | 54% | 51% | 10%                                 | 100% | 10%  |
|               |        | School  | 30%                                            | 26% | 30% | 89%                              | 98% | 89% | 71%                                 | 97%  | 71%  |

|             |         | Los Angeles |         |       |        | San Francisco |         |       | New York City |         |       |
|-------------|---------|-------------|---------|-------|--------|---------------|---------|-------|---------------|---------|-------|
|             |         | Day         | Evening | Night | School | Day           | Evening | Night | Day           | Evening | Night |
| Los Angeles | Spring  | Day         | 20%     | 18%   | 24%    | 87%           | 91%     | 79%   | 41%           | 63%     | 0%    |
|             |         | Evening     | 30%     | 28%   | 34%    | 64%           | 68%     | 56%   | 31%           | 50%     | 0%    |
|             |         | Night       | 42%     | 42%   | 40%    | 42%           | 45%     | 48%   | 0%            | 10%     | 0%    |
|             |         | School      | 21%     | 18%   | 24%    | 87%           | 93%     | 81%   | 46%           | 75%     | 0%    |
|             | Summer  | Day         | 11%     | 11%   | 17%    | 76%           | 76%     | 64%   | 0%            | 0%      | 0%    |
|             |         | Evening     | 22%     | 22%   | 27%    | 52%           | 52%     | 40%   | 0%            | 0%      | 0%    |
|             |         | Night       | 34%     | 34%   | 32%    | 32%           | 32%     | 35%   | 0%            | 0%      | 0%    |
|             | Autumn  | Day         | 32%     | 26%   | 33%    | 83%           | 93%     | 81%   | 76%           | 100%    | 70%   |
|             |         | Evening     | 40%     | 36%   | 42%    | 60%           | 69%     | 57%   | 64%           | 100%    | 56%   |
|             |         | Night       | 49%     | 47%   | 49%    | 50%           | 53%     | 49%   | 30%           | 100%    | 10%   |
|             |         | School      | 31%     | 26%   | 33%    | 84%           | 94%     | 82%   | 81%           | 100%    | 75%   |
|             | Winter  | Day         | 32%     | 27%   | 32%    | 87%           | 97%     | 87%   | 71%           | 100%    | 71%   |
| Evening     |         | 40%         | 34%     | 40%   | 64%    | 76%           | 64%     | 66%   | 100%          | 59%     |       |
| Night       |         | 50%         | 49%     | 50%   | 51%    | 55%           | 51%     | 30%   | 100%          | 30%     |       |
| School      |         | 32%         | 27%     | 32%   | 88%    | 98%           | 88%     | 82%   | 100%          | 82%     |       |
| Spring      | Day     | 21%         | 19%     | 26%   | 85%    | 89%           | 77%     | 75%   | 88%           | 38%     |       |
|             | Evening | 31%         | 29%     | 35%   | 60%    | 65%           | 52%     | 65%   | 81%           | 29%     |       |
|             | Night   | 42%         | 41%     | 40%   | 42%    | 45%           | 47%     | 30%   | 50%           | 10%     |       |
|             | School  | 22%         | 20%     | 26%   | 85%    | 91%           | 78%     | 83%   | 100%          | 50%     |       |
| Summer      | Day     | 12%         | 12%     | 18%   | 72%    | 72%           | 60%     | 0%    | 0%            | 0%      |       |
|             | Evening | 22%         | 22%     | 28%   | 49%    | 49%           | 36%     | 0%    | 0%            | 0%      |       |
|             | Night   | 33%         | 33%     | 31%   | 31%    | 31%           | 34%     | 0%    | 0%            | 0%      |       |
| Anchorage   | Autumn  | Day         | 34%     | 34%   | 34%    | 86%           | 96%     | 84%   | 94%           | 100%    | 88%   |
|             |         | Evening     | 40%     | 37%   | 41%    | 62%           | 72%     | 60%   | 91%           | 100%    | 84%   |
|             |         | Night       | 56%     | 53%   | 56%    | 51%           | 53%     | 49%   | 80%           | 100%    | 60%   |
|             |         | School      | 34%     | 34%   | 34%    | 86%           | 96%     | 84%   | 94%           | 100%    | 88%   |
|             | Winter  | Day         | 41%     | 41%   | 41%    | 90%           | 98%     | 90%   | 100%          | 100%    | 100%  |
|             |         | Evening     | 43%     | 41%   | 43%    | 67%           | 79%     | 67%   | 100%          | 100%    | 100%  |
|             |         | Night       | 60%     | 56%   | 60%    | 52%           | 56%     | 52%   | 100%          | 100%    | 100%  |
|             |         | School      | 41%     | 42%   | 41%    | 91%           | 98%     | 91%   | 100%          | 100%    | 100%  |
|             | Spring  | Day         | 12%     | 11%   | 16%    | 85%           | 89%     | 77%   | 25%           | 44%     | 3%    |
|             |         | Evening     | 22%     | 21%   | 26%    | 61%           | 65%     | 53%   | 16%           | 32%     | 0%    |
|             |         | Night       | 38%     | 39%   | 37%    | 42%           | 45%     | 47%   | 0%            | 10%     | 0%    |
|             |         | School      | 14%     | 12%   | 17%    | 85%           | 91%     | 78%   | 33%           | 58%     | 4%    |
|             | Summer  | Day         | 0%      | 0%    | 0%     | 67%           | 67%     | 55%   | 0%            | 0%      | 0%    |
|             |         | Evening     | 0%      | 0%    | 0%     | 43%           | 43%     | 31%   | 0%            | 0%      | 0%    |
|             |         | Night       | 0%      | 0%    | 0%     | 26%           | 26%     | 29%   | 0%            | 0%      | 0%    |

**Supplementary Data Table S2. Average Effectiveness During Work Day and Commutes by City, Season, and Shift by Time Change Condition**

|               |        |         | Average Effectiveness<br>Commute to Work |       |       | Average Effectiveness<br>at Work |       |       | Average Effectiveness<br>Commute Home |       |       |
|---------------|--------|---------|------------------------------------------|-------|-------|----------------------------------|-------|-------|---------------------------------------|-------|-------|
| City          | Season | Shift   | CTA                                      | DST   | ST    | CTA                              | DST   | ST    | CTA                                   | DST   | ST    |
| New York City | Autumn | Day     | 99.26                                    | 99.04 | 99.11 | 97.63                            | 97.52 | 97.55 | 98.57                                 | 98.39 | 98.42 |
|               |        | Evening | 96.71                                    | 96.66 | 96.57 | 97.53                            | 97.60 | 97.55 | 87.37                                 | 87.73 | 87.81 |
|               |        | Night   | 90.39                                    | 91.42 | 91.37 | 73.61                            | 73.97 | 73.94 | 70.01                                 | 69.41 | 69.45 |
|               |        | School  | 97.64                                    | 97.37 | 97.41 | 98.18                            | 98.09 | 98.10 | 96.22                                 | 96.05 | 96.09 |
|               | Winter | Day     | 99.03                                    | 99.01 | 99.03 | 97.51                            | 97.50 | 97.51 | 98.35                                 | 98.34 | 98.35 |
|               |        | Evening | 96.60                                    | 96.55 | 96.60 | 97.58                            | 97.53 | 97.58 | 87.87                                 | 88.21 | 87.87 |
|               |        | Night   | 91.19                                    | 91.19 | 91.19 | 73.85                            | 73.85 | 73.85 | 69.54                                 | 69.54 | 69.54 |
|               |        | School  | 97.43                                    | 97.41 | 97.43 | 98.11                            | 98.11 | 98.11 | 96.09                                 | 96.07 | 96.09 |
|               | Spring | Day     | 98.86                                    | 99.06 | 99.07 | 97.41                            | 97.53 | 97.53 | 98.17                                 | 98.38 | 98.34 |
|               |        | Evening | 96.38                                    | 96.56 | 96.62 | 97.48                            | 97.60 | 97.67 | 88.49                                 | 88.30 | 88.00 |
|               |        | Night   | 90.78                                    | 91.12 | 91.09 | 72.64                            | 73.80 | 73.80 | 67.22                                 | 69.53 | 69.55 |
|               |        | School  | 96.96                                    | 97.31 | 97.31 | 97.89                            | 98.06 | 98.06 | 95.86                                 | 96.02 | 96.04 |
|               | Summer | Day     | 99.08                                    | 99.08 | 99.12 | 97.53                            | 97.53 | 97.56 | 98.40                                 | 98.40 | 98.40 |
|               |        | Evening | 96.79                                    | 96.79 | 96.64 | 97.60                            | 97.60 | 97.56 | 87.11                                 | 87.11 | 87.46 |
|               |        | Night   | 91.19                                    | 91.19 | 91.13 | 73.85                            | 73.85 | 73.84 | 69.54                                 | 69.54 | 69.57 |
| Chicago       | Autumn | Day     | 99.26                                    | 99.04 | 99.11 | 97.63                            | 97.52 | 97.55 | 98.57                                 | 98.39 | 98.42 |
|               |        | Evening | 96.73                                    | 96.66 | 96.60 | 97.55                            | 97.60 | 97.55 | 87.33                                 | 87.73 | 87.77 |
|               |        | Night   | 90.39                                    | 91.42 | 91.37 | 73.61                            | 73.97 | 73.94 | 70.01                                 | 69.41 | 69.45 |
|               |        | School  | 98.48                                    | 98.25 | 98.27 | 98.14                            | 98.06 | 98.07 | 96.33                                 | 96.18 | 96.21 |
|               | Winter | Day     | 99.03                                    | 99.01 | 99.03 | 97.51                            | 97.50 | 97.51 | 98.35                                 | 98.34 | 98.35 |
|               |        | Evening | 96.60                                    | 96.55 | 96.60 | 97.58                            | 97.53 | 97.58 | 87.87                                 | 88.21 | 87.87 |
|               |        | Night   | 91.19                                    | 91.19 | 91.19 | 73.85                            | 73.85 | 73.85 | 69.54                                 | 69.54 | 69.54 |
|               |        | School  | 98.29                                    | 98.28 | 98.29 | 98.08                            | 98.08 | 98.08 | 96.21                                 | 96.19 | 96.21 |
|               | Spring | Day     | 98.85                                    | 99.06 | 99.06 | 97.40                            | 97.53 | 97.51 | 98.15                                 | 98.38 | 98.32 |
|               |        | Evening | 96.35                                    | 96.55 | 96.62 | 97.45                            | 97.60 | 97.67 | 88.57                                 | 88.31 | 88.00 |
|               |        | Night   | 90.78                                    | 91.12 | 91.09 | 72.64                            | 73.80 | 73.79 | 67.22                                 | 69.53 | 69.55 |
|               |        | School  | 97.83                                    | 98.19 | 98.17 | 97.86                            | 98.04 | 98.01 | 95.94                                 | 96.15 | 96.12 |
|               | Summer | Day     | 99.09                                    | 99.09 | 99.12 | 97.54                            | 97.54 | 97.56 | 98.42                                 | 98.42 | 98.40 |
|               |        | Evening | 96.77                                    | 96.77 | 96.64 | 97.61                            | 97.61 | 97.56 | 87.27                                 | 87.27 | 87.46 |
|               |        | Night   | 91.19                                    | 91.19 | 91.13 | 73.85                            | 73.85 | 73.84 | 69.54                                 | 69.54 | 69.57 |
| El Paso       | Autumn | Day     | 99.26                                    | 99.04 | 99.11 | 97.63                            | 97.52 | 97.55 | 98.57                                 | 98.39 | 98.42 |
|               |        | Evening | 96.73                                    | 96.66 | 96.60 | 97.55                            | 97.60 | 97.56 | 87.32                                 | 87.73 | 87.76 |
|               |        | Night   | 90.39                                    | 91.42 | 91.37 | 73.61                            | 73.97 | 73.94 | 70.01                                 | 69.41 | 69.45 |
|               |        | School  | 99.31                                    | 99.08 | 99.15 | 97.65                            | 97.54 | 97.57 | 98.63                                 | 98.43 | 98.46 |
|               | Winter | Day     | 99.09                                    | 99.01 | 99.09 | 97.55                            | 97.50 | 97.55 | 98.38                                 | 98.34 | 98.38 |
|               |        | Evening | 96.45                                    | 96.55 | 96.45 | 97.53                            | 97.53 | 97.53 | 88.20                                 | 88.21 | 88.20 |
|               |        | Night   | 91.13                                    | 91.19 | 91.13 | 73.84                            | 73.85 | 73.84 | 69.57                                 | 69.54 | 69.57 |
|               |        | School  | 97.94                                    | 97.89 | 97.94 | 97.98                            | 97.92 | 97.98 | 96.54                                 | 96.51 | 96.54 |
|               | Spring | Day     | 98.83                                    | 99.02 | 99.09 | 97.39                            | 97.51 | 97.54 | 98.15                                 | 98.36 | 98.36 |

|             |        |         |       |       |       |       |       |       |       |       |       |
|-------------|--------|---------|-------|-------|-------|-------|-------|-------|-------|-------|-------|
| Los Angeles |        | Evening | 96.46 | 96.64 | 96.62 | 97.51 | 97.64 | 97.67 | 88.32 | 88.13 | 88.00 |
|             |        | Night   | 90.76 | 91.14 | 91.09 | 72.63 | 73.80 | 73.80 | 67.24 | 69.52 | 69.55 |
|             |        | School  | 97.42 | 97.76 | 97.81 | 97.73 | 97.86 | 97.92 | 96.21 | 96.43 | 96.45 |
|             |        | Day     | 99.12 | 99.12 | 99.12 | 97.56 | 97.56 | 97.56 | 98.40 | 98.40 | 98.40 |
|             | Summer | Evening | 96.64 | 96.64 | 96.65 | 97.56 | 97.56 | 97.55 | 87.46 | 87.46 | 87.39 |
|             |        | Night   | 91.13 | 91.13 | 91.13 | 73.84 | 73.84 | 73.84 | 69.57 | 69.57 | 69.57 |
|             | Autumn | Day     | 99.26 | 99.04 | 99.11 | 97.63 | 97.52 | 97.55 | 98.57 | 98.39 | 98.42 |
|             |        | Evening | 96.75 | 96.66 | 96.65 | 97.57 | 97.60 | 97.57 | 87.25 | 87.73 | 87.59 |
|             |        | Night   | 90.39 | 91.42 | 91.37 | 73.61 | 73.97 | 73.94 | 70.01 | 69.41 | 69.45 |
|             |        | School  | 98.22 | 97.98 | 98.00 | 98.26 | 98.17 | 98.19 | 96.20 | 96.06 | 96.09 |
|             | Winter | Day     | 99.09 | 99.01 | 99.09 | 97.55 | 97.50 | 97.55 | 98.38 | 98.34 | 98.38 |
|             |        | Evening | 96.45 | 96.59 | 96.45 | 97.53 | 97.56 | 97.53 | 88.20 | 88.04 | 88.20 |
|             |        | Night   | 91.13 | 91.19 | 91.13 | 73.84 | 73.85 | 73.84 | 69.57 | 69.54 | 69.57 |
|             |        | School  | 98.04 | 98.03 | 98.04 | 98.21 | 98.19 | 98.21 | 96.11 | 96.09 | 96.11 |
|             | Spring | Day     | 98.85 | 99.06 | 99.07 | 97.41 | 97.53 | 97.53 | 98.17 | 98.38 | 98.34 |
|             |        | Evening | 96.38 | 96.56 | 96.63 | 97.47 | 97.60 | 97.66 | 88.45 | 88.30 | 87.97 |
|             |        | Night   | 90.78 | 91.12 | 91.09 | 72.64 | 73.80 | 73.80 | 67.22 | 69.53 | 69.55 |
|             |        | School  | 97.57 | 97.92 | 97.89 | 97.99 | 98.16 | 98.16 | 95.86 | 96.03 | 96.04 |
|             | Summer | Day     | 99.12 | 99.12 | 99.09 | 97.56 | 97.56 | 97.53 | 98.40 | 98.40 | 98.37 |
|             |        | Evening | 96.64 | 96.64 | 96.65 | 97.56 | 97.56 | 97.55 | 87.46 | 87.46 | 87.39 |
|             |        | Night   | 91.13 | 91.13 | 91.13 | 73.84 | 73.84 | 73.84 | 69.57 | 69.57 | 69.57 |
| Anchorage   | Autumn | Day     | 99.20 | 99.04 | 99.04 | 97.60 | 97.52 | 97.52 | 98.55 | 98.39 | 98.39 |
|             |        | Evening | 96.71 | 96.56 | 96.62 | 97.54 | 97.55 | 97.56 | 87.80 | 88.37 | 88.05 |
|             |        | Night   | 90.46 | 91.42 | 91.42 | 73.65 | 73.97 | 73.97 | 69.97 | 69.41 | 69.41 |
|             |        | School  | 98.90 | 98.71 | 98.71 | 97.99 | 97.91 | 97.91 | 96.46 | 96.32 | 96.32 |
|             | Winter | Day     | 99.01 | 99.01 | 99.01 | 97.50 | 97.50 | 97.50 | 98.34 | 98.34 | 98.34 |
|             |        | Evening | 96.52 | 96.49 | 96.52 | 97.51 | 97.50 | 97.51 | 88.41 | 88.57 | 88.41 |
|             |        | Night   | 91.19 | 91.19 | 91.19 | 73.85 | 73.85 | 73.85 | 69.54 | 69.54 | 69.54 |
|             |        | School  | 98.76 | 98.76 | 98.76 | 97.94 | 97.94 | 97.94 | 96.34 | 96.34 | 96.34 |
|             | Spring | Day     | 98.80 | 99.02 | 99.07 | 97.38 | 97.51 | 97.53 | 98.14 | 98.36 | 98.37 |
|             |        | Evening | 96.42 | 96.62 | 96.56 | 97.48 | 97.63 | 97.62 | 88.46 | 88.22 | 88.24 |
|             |        | Night   | 90.77 | 91.15 | 91.09 | 72.64 | 73.81 | 73.80 | 67.23 | 69.52 | 69.55 |
|             |        | School  | 98.33 | 98.65 | 98.68 | 97.73 | 97.88 | 97.91 | 96.05 | 96.26 | 96.29 |
|             | Summer | Day     | 99.09 | 99.09 | 99.09 | 97.54 | 97.54 | 97.54 | 98.43 | 98.43 | 98.43 |
|             |        | Evening | 96.51 | 96.51 | 96.51 | 97.49 | 97.49 | 97.49 | 88.50 | 88.50 | 88.50 |
|             |        | Night   | 91.19 | 91.19 | 91.19 | 73.85 | 73.85 | 73.85 | 69.54 | 69.54 | 69.54 |

**Supplementary Data Table S3. Average Effectiveness and Percent Darkness During Morning Rush Hour by City, Season, and Time Change Condition**

|                                    |        | Average Effectiveness |         |       | Percent Darkness |       |     |
|------------------------------------|--------|-----------------------|---------|-------|------------------|-------|-----|
| City                               | Season | CTA                   | DST     | ST    | CTA              | DST   | ST  |
| <b>New York City</b>               | Autumn | 88.97                 | 88.61   | 88.66 | 0%               | 3%    | 0%  |
|                                    | Winter | 88.67                 | 88.65   | 88.67 | 0%               | 33%   | 0%  |
|                                    | Spring | 87.68                 | 88.63   | 88.64 | 0%               | 0%    | 0%  |
|                                    | Summer | 84.31                 | 84.31   | 84.35 | 0%               | 0%    | 0%  |
| <b>Chicago</b>                     | Autumn | 89.25                 | 88.90   | 88.94 | 0%               | 1%    | 0%  |
|                                    | Winter | 88.95                 | 88.94   | 88.95 | 0%               | 25%   | 0%  |
|                                    | Spring | 87.97                 | 88.93   | 88.93 | 0%               | 0%    | 0%  |
|                                    | Summer | 84.31                 | 84.31   | 84.35 | 0%               | 0%    | 0%  |
| <b>El Paso</b>                     | Autumn | 87.83                 | 88.76   | 88.82 | 0%               | 1%    | 0%  |
|                                    | Winter | 84.35                 | 84.35   | 84.35 | 0%               | 19%   | 0%  |
|                                    | Spring | 89.53                 | 89.18   | 89.24 | 0%               | 0%    | 0%  |
|                                    | Summer | 88.87                 | 88.81   | 88.87 | 0%               | 0%    | 0%  |
| <b>Los Angeles</b>                 | Autumn | 87.88                 | 88.84   | 88.84 | 0%               | 0%    | 0%  |
|                                    | Winter | 84.35                 | 84.35   | 84.33 | 0%               | 14%   | 0%  |
|                                    | Spring | 89.16                 | 88.81   | 88.85 | 0%               | 0%    | 0%  |
|                                    | Summer | 88.90                 | 88.86   | 88.90 | 0%               | 0%    | 0%  |
| <b>Anchorage</b>                   | Autumn | 89.36                 | 89.05   | 89.05 | 40%              | 88%   | 34% |
|                                    | Winter | 89.10                 | 89.10   | 89.10 | 87%              | 100%  | 87% |
|                                    | Spring | 88.12                 | 89.06   | 89.10 | 1%               | 7%    | 0%  |
|                                    | Summer | 84.31                 | 84.31   | 84.31 | 0%               | 0%    | 0%  |
| <b>Included Schedules by Shift</b> |        | Day                   | Evening | Night | School           | Total |     |
| Commute to Work                    |        | 20                    | 0       | 0     | 15               | 55    |     |
| Commute Home                       |        | 0                     | 0       | 20    | 0                |       |     |

**Supplementary Data Table S4. Average Effectiveness and Percent Darkness During Evening Rush Hour by City, Season, and Time Change Condition**

| Average Effectiveness       |               |        |         |       |       | Percent Darkness |    |       |
|-----------------------------|---------------|--------|---------|-------|-------|------------------|----|-------|
|                             |               |        |         |       |       |                  |    |       |
| Evening                     | New York City | Autumn | 97.64   | 97.53 | 97.50 | 19%              | 0% | 21%   |
|                             |               | Winter | 97.48   | 97.45 | 97.48 | 20%              | 0% | 20%   |
|                             |               | Spring | 97.27   | 97.47 | 97.48 | 0%               | 0% | 0%    |
|                             |               | Summer | 97.60   | 97.60 | 97.52 | 0%               | 0% | 0%    |
|                             | Chicago       | Autumn | 97.65   | 97.53 | 97.51 | 24%              | 0% | 27%   |
|                             |               | Winter | 97.48   | 97.45 | 97.48 | 25%              | 0% | 25%   |
|                             |               | Spring | 97.25   | 97.46 | 97.47 | 0%               | 0% | 0%    |
|                             |               | Summer | 97.59   | 97.59 | 97.52 | 0%               | 0% | 0%    |
|                             | El Paso       | Autumn | 97.65   | 97.53 | 97.51 | 3%               | 0% | 3%    |
|                             |               | Winter | 97.42   | 97.45 | 97.42 | 0%               | 0% | 0%    |
|                             |               | Spring | 97.31   | 97.50 | 97.49 | 0%               | 0% | 0%    |
|                             |               | Summer | 97.52   | 97.52 | 97.53 | 0%               | 0% | 0%    |
|                             | Los Angeles   | Autumn | 97.66   | 97.53 | 97.54 | 13%              | 0% | 14%   |
|                             |               | Winter | 97.42   | 97.46 | 97.42 | 9%               | 0% | 9%    |
|                             |               | Spring | 97.27   | 97.47 | 97.49 | 0%               | 0% | 0%    |
|                             |               | Summer | 97.52   | 97.52 | 97.51 | 0%               | 0% | 0%    |
|                             | Anchorage     | Autumn | 97.63   | 97.48 | 97.50 | 7%               | 0% | 7%    |
|                             |               | Winter | 97.43   | 97.41 | 97.43 | 17%              | 0% | 17%   |
|                             |               | Spring | 97.28   | 97.49 | 97.46 | 0%               | 0% | 0%    |
|                             |               | Summer | 97.47   | 97.47 | 97.47 | 0%               | 0% | 0%    |
| Included Schedules by Shift |               | Day    | Evening |       | Night | School           |    | Total |
| Commute to Work             |               | 0      | 20      |       | 0     | 0                |    | 40    |
| Commute Home                |               | 20     | 0       |       | 0     | 0                |    |       |
